# Supplementary material for: Wet milled synthesis of an Sb/MWCNT nanocomposite for improved sodium storage
Source: Royal Society of Chemistry journal article supplement (doi:10.1039/c3ta13438e), 2013-01-01
Supplement: c3ta13438e.pdf [file c3ta13438e.pdf]

Electronic Supplementary Information for

## **Wet milled synthesis of Sb /MWCNT nanocomposite for improved sodium storage**

Xiaosi Zhou,<sup>\*a,b</sup> Zhihui Dai,<sup>a</sup> Jianchun Bao<sup>a</sup> and Yu-Guo Guo<sup>\*b</sup>

<sup>a</sup> Jiangsu Key Laboratory of Biofunctional Materials,  
School of Chemistry and Material Science, Nanjing Normal University,  
Nanjing 210023, P. R. China  
E-mail: [zhouxiaosi@iccas.ac.cn](mailto:zhouxiaosi@iccas.ac.cn)

<sup>b</sup> CAS Key Laboratory of Molecular Nanostructure and Nanotechnology,  
Beijing National Laboratory for Molecular Sciences (BNLMS),  
Institute of Chemistry, Chinese Academy of Sciences (CAS),  
Beijing 100190, P. R. China  
E-mail: [ygguo@iccas.ac.cn](mailto:ygguo@iccas.ac.cn)

### **Experimental Section**

*Synthesis of Sb nanoparticle/multiwalled carbon nanotube nanocomposite (SbNP/MWCNT):* 700 mg of Sb powders (200 mesh, Alfa Aesar) and 200 mg of MWCNTs (40-60 nm in diameter and 5-15  $\mu$ m in length, Shenzhen Nanotech Port Co., Ltd.) were wet milled in acetone at 1200 rpm for 12 h using a WL-IA planetary mill. After centrifugating and subsequently drying the resulting mixture at 60 °C under vacuum, the final product SbNP/MWCNT was obtained. In addition, Sb powders were wet milled through the same procedures as synthesizing SbNP/MWCNT without adding any MWCNTs. MWCNTs were wet milled through the same procedures as synthesizing SbNP/MWCNT without adding any Sb powders.

*Structural and electrochemical characterization:* SEM measurements were carried out on a Hitachi S-4800 field emission scanning electron microscope operated at 15 kV. TEM and HRTEM characterizations were performed on a Tecnai G2 F20 U-TWIN field emission transmission electron microscope operated at 200 kV. EDX

analysis was conducted on an EDAX system. XRD pattern was conducted on a Rigaku D/max2500 diffractometer using Cu K $\alpha$  radiation. Thermogravimetric (TG) analysis was investigated with a NETZSCH STA 409 PC/PG instrument. Nitrogen adsorption and desorption isotherms at 77.3 K were determined by a Nova 2000e surface area-pore size analyzer. Electrochemical experiments were performed using CR2032 coin cells. To make working electrodes, Sb/MWCNTs, Super-P carbon black, and carboxymethyl cellulose sodium with mass ratio of 80:10:10 were added to water, and mixed into homogeneous slurry with mortar and pestle. The resulting slurry was pasted onto pure Cu foil (99.9 %, Goodfellow). The electrolyte was 1 M NaClO<sub>4</sub> in ethylene carbonate (EC)/propylene carbonate (PC) (1:1 v/v) with addition of 5% or 10% fluoroethylene carbonate (FEC). Glass fibers (GF/D) from Whatman were used as separators and sodium metal was utilized as the counter electrode. The coin cells were assembled in an argon-filled glove box (H<sub>2</sub>O, O<sub>2</sub> < 0.1 ppm, Mbraun, Germany). Cyclic voltammetry was conducted on a CHI 733D electrochemical workstation at a scan rate of 0.1 mV s<sup>-1</sup>. The charge and discharge measurements of the batteries were performed on a Land CT2001A multi-channel battery testing system in the fixed voltage window between 0 and 2 V vs. Na<sup>+</sup>/Na at room temperature. Electrochemical impedance spectral measurements were carried out on a PARSTAT 2273 advanced electrochemical system in the frequency range from 100 kHz to 100 mHz.

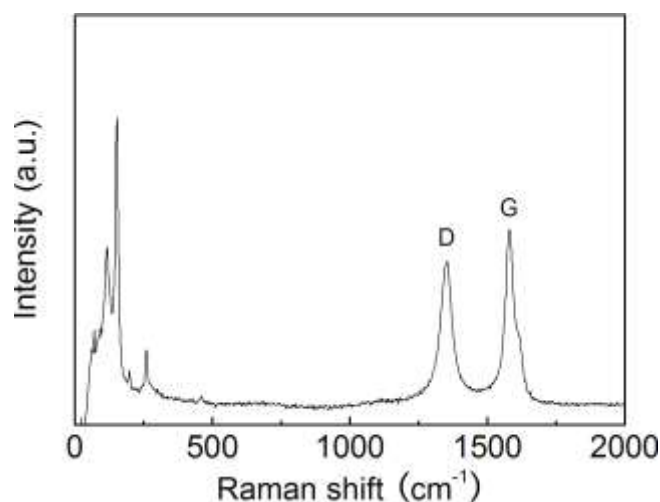

**Figure S1.** Raman spectrum of SbNP/MWCNT.

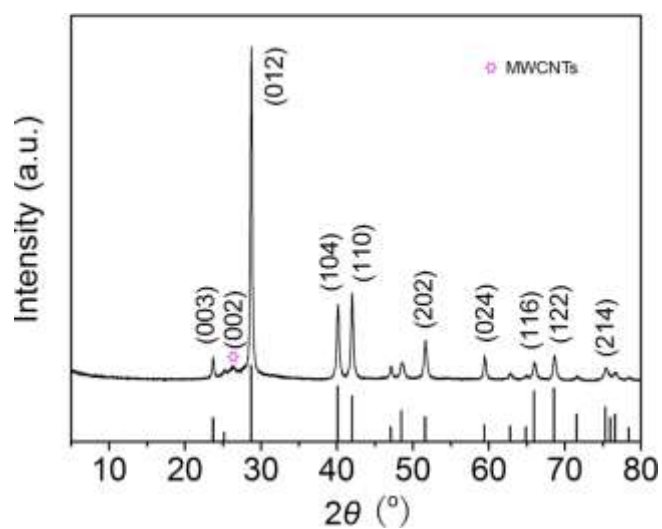

**Figure S2.** XRD pattern of SbNP/MWCNT. The peak marked with a red asterisk corresponds to the (002) plane of MWCNTs.

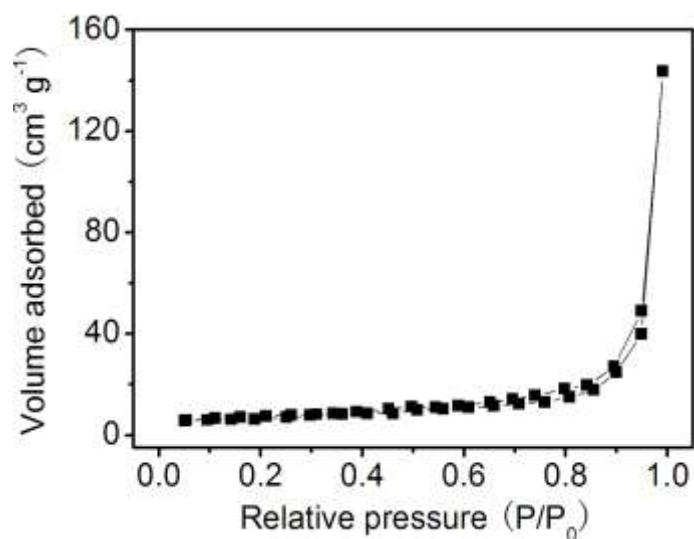

**Figure S3.** Nitrogen adsorption/desorption isotherms of SbNP/MWCNT.

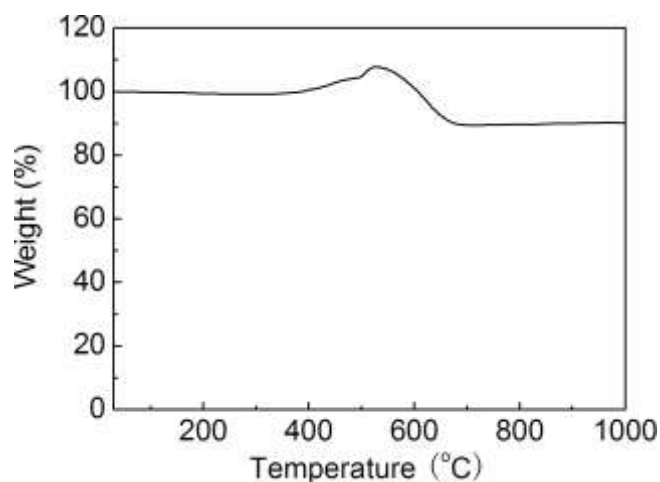

**Figure S4.** TG analysis curves of SbNP/MWCNT under air atmosphere at a heating rate of  $10\text{ }^{\circ}\text{C min}^{-1}$ .

**Table S1.** Summary of specific capacities of the Sb electrodes reported previously and in this work.

| Current density<br>( $\text{mA g}^{-1}$ ) | Voltage range<br>(V) vs. $\text{Na}^+/\text{Na}$ | Initial capacity<br>( $\text{mA h g}^{-1}$ ) | Cycle number<br>(n) | Residual capacity<br>( $\text{mA h g}^{-1}$ ) | Ref.      |
|-------------------------------------------|--------------------------------------------------|----------------------------------------------|---------------------|-----------------------------------------------|-----------|
| 100                                       | 0–2                                              | 610                                          | 100                 | ~580                                          | 36        |
| 330                                       | 0.02–1.5                                         | 537                                          | 80                  | 576                                           | 37        |
| 100                                       | 0–2                                              | 422                                          | 300                 | 350                                           | 38        |
| 100                                       | 0–1.2                                            | 544                                          | 50                  | 453                                           | 39        |
| 200                                       | 0–2                                              | 502                                          | 120                 | 382                                           | This work |

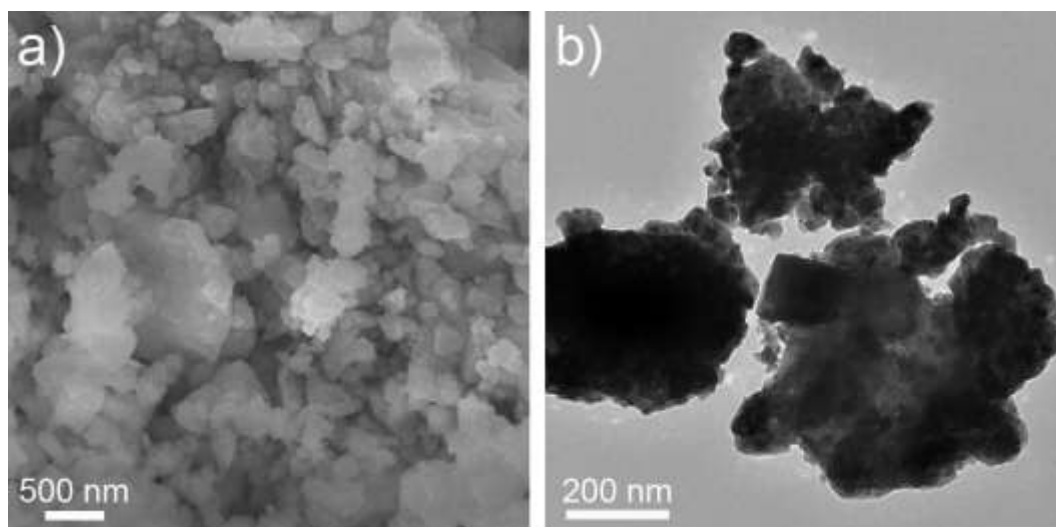

**Figure S5.** (a) SEM and (b) TEM images of wet milled Sb powder.

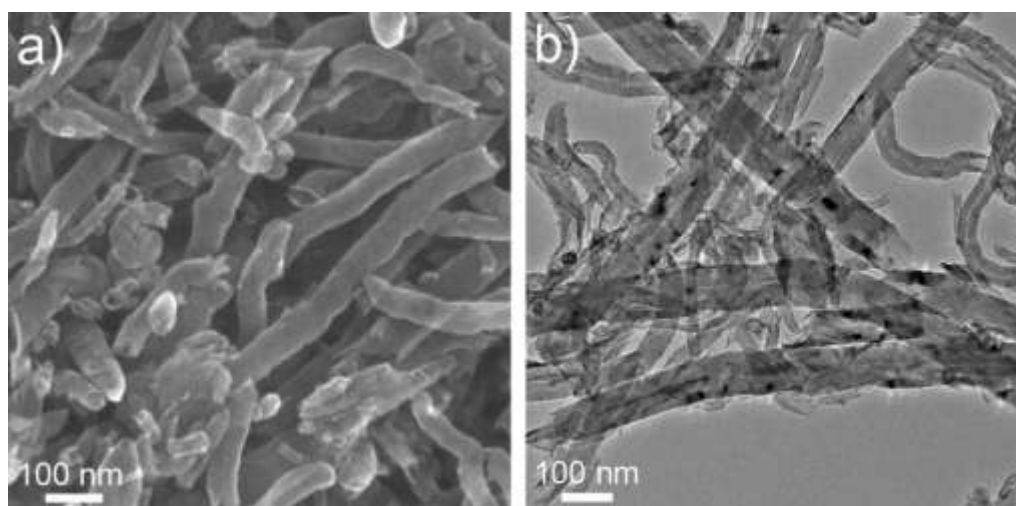

**Figure S6.** (a) SEM and (b) TEM images of wet milled MWCNTs.

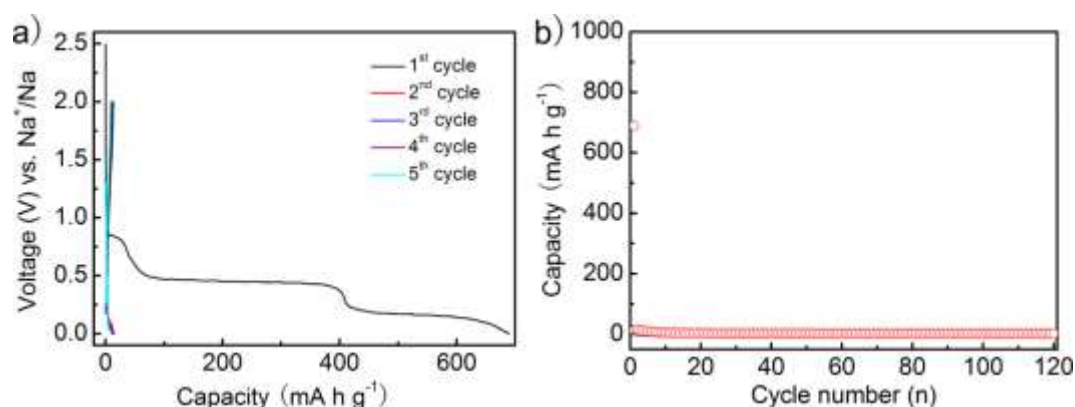

**Figure S7.** a) Galvanostatic charge/discharge profiles and b) cycling performance of the Sb electrode in the voltage range of 0 to 2 V vs.  $\text{Na}^+/\text{Na}$ . The first ten cycles are under  $0.1 \text{ A g}^{-1}$  and the remaining cycles are under  $0.2 \text{ A g}^{-1}$ .

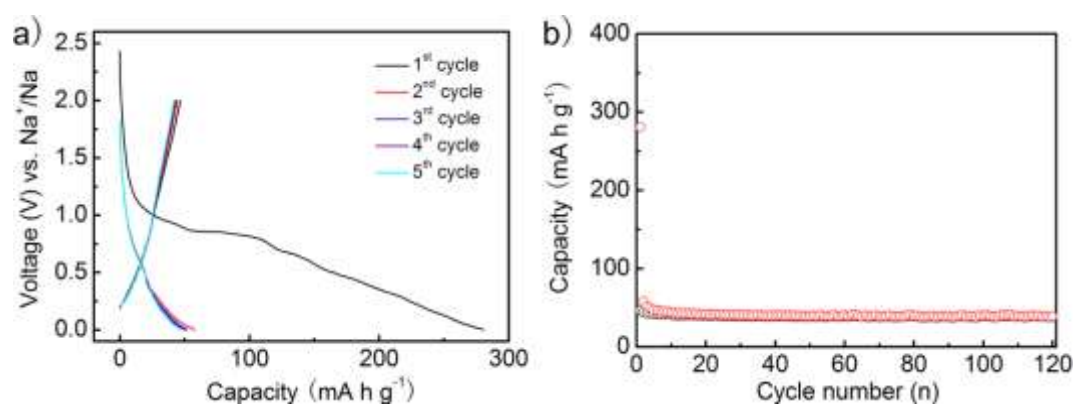

**Figure S8.** a) Galvanostatic charge/discharge profiles and b) cycling performance of the MWCNT electrode in the voltage range of 0 to 2 V vs.  $\text{Na}^+/\text{Na}$ . The first ten cycles are under  $0.1 \text{ A g}^{-1}$  and the remaining cycles are under  $0.2 \text{ A g}^{-1}$ .

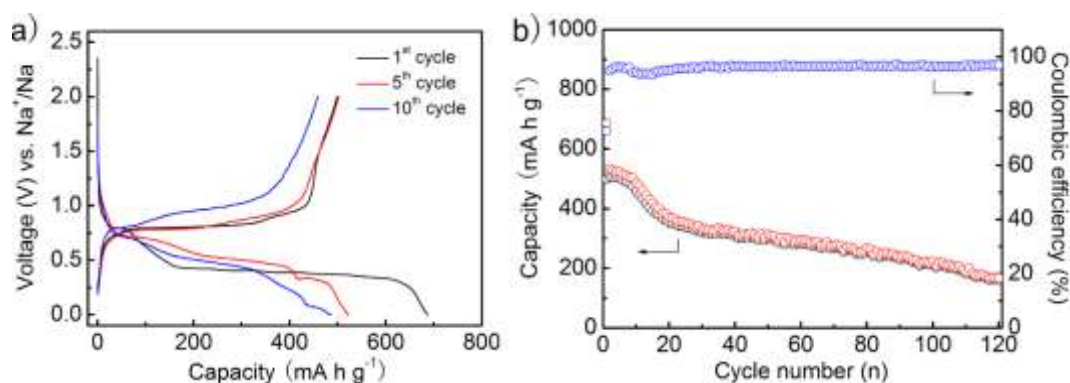

**Figure S9.** a) Galvanostatic charge/discharge profiles and b) cycling performance and Coulombic efficiency of the SbNP/MWCNT electrode in the voltage range of 0 to 2 V vs. Na<sup>+</sup>/Na using 1 M NaClO<sub>4</sub> in EC/PC with addition of 10% FEC as the electrolyte. The first ten cycles are under 0.1 A g<sup>-1</sup> and the remaining cycles are under 0.2 A g<sup>-1</sup>.

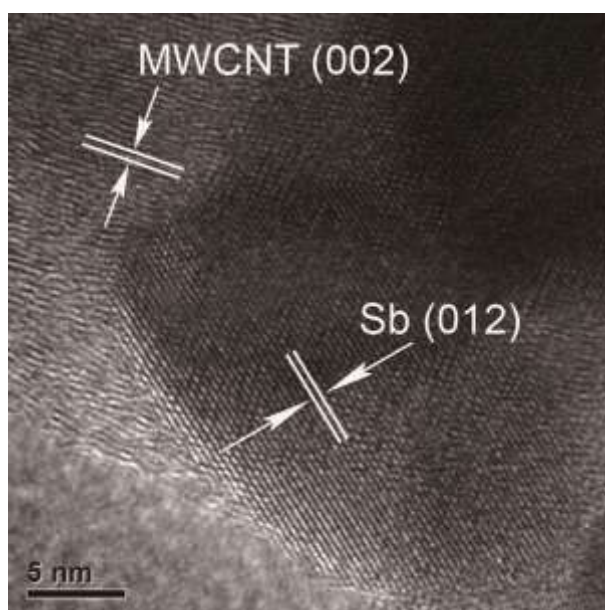

**Figure S10.** HRTEM of the SbNP/MWCNT electrode after 120 cycles.

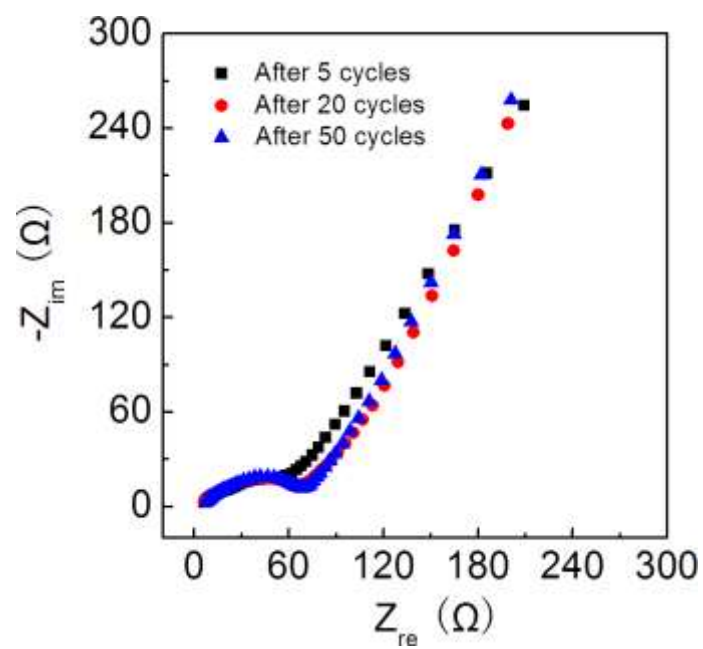

**Figure S11.** Nyquist plots of the SbNP/MWCNT electrode for different cycles.
